# Supplementary material for: Facile fabrication and characterization of two-dimensional bismuth(iii) sulfide nanosheets for high-performance photodetector applications under ambient conditions
Source: Royal Society of Chemistry journal article supplement (doi:10.1039/c7nr09046c), 2017-12-22
Supplement: c7nr09046c1.pdf [file c7nr09046c1.pdf]

Supporting information for

**Facile Fabrication and Characterizations of Two-Dimensional Bismuth (III) Sulfide Nanosheets for High-Performance Photodetector Applications under Ambient Conditions**

Weichun Huang,<sup>‡a</sup> Chenyang Xing,<sup>‡a</sup> Yunzheng Wang,<sup>a</sup> Zhongjun Li,<sup>b</sup> Leiming Wu,<sup>b</sup> Dingtao Ma,<sup>b</sup> Xiaoyu Dai,<sup>a</sup> Yuanjiang Xiang,<sup>a</sup> Jianqing Li,<sup>b</sup> Dianyuan Fan,<sup>a</sup> and Han Zhang<sup>\*a</sup>

*<sup>a</sup>. SZU-NUS Collaborative Innovation Centre for Optoelectronic Science & Technology, and Key Laboratory of Optoelectronic Devices and Systems of Ministry of Education and Guangdong Province, College of Optoelectronic Engineering, Shenzhen University, Shenzhen 518060, China. E-mail: hzhang@szu.edu.cn*

*<sup>b</sup>. Faculty of Information Technology, Macau University of Science and Technology, Macao 519020, P. R. China*

*<sup>‡</sup>Denotes equal first-author contribution.*

**Table S1** The light powder density ( $P_\lambda$ ) of incident light with various irradiation wavelengths.

The gradually increased  $P_\lambda$  were labelled with **I**, **II**, **III**, **IV**, and **VI** levels, respectively.

| $P_\lambda$ (mW/cm <sup>2</sup> ) | <b>I</b> level | <b>II</b> level | <b>III</b> level | <b>IV</b> level | <b>VI</b> level |
|-----------------------------------|----------------|-----------------|------------------|-----------------|-----------------|
| Simulated light (SL)              | 26.2           | 53.0            | 83.1             | 118             | 122             |
| 365 nm                            | 0.764          | 1.66            | 2.55             | 3.57            | 3.69            |
| 400 nm                            | 0.637          | 2.04            | 3.57             | 5.22            | 5.35            |
| 475 nm                            | 1.91           | 4.33            | 7.01             | 10.1            | 10.6            |
| 550 nm                            | 2.04           | 3.95            | 5.98             | 8.28            | 8.40            |
| 650 nm                            | 2.04           | 4.08            | 6.02             | 8.54            | 8.92            |
| 700 nm                            | 1.15           | 2.42            | 4.08             | 6.11            | 6.14            |

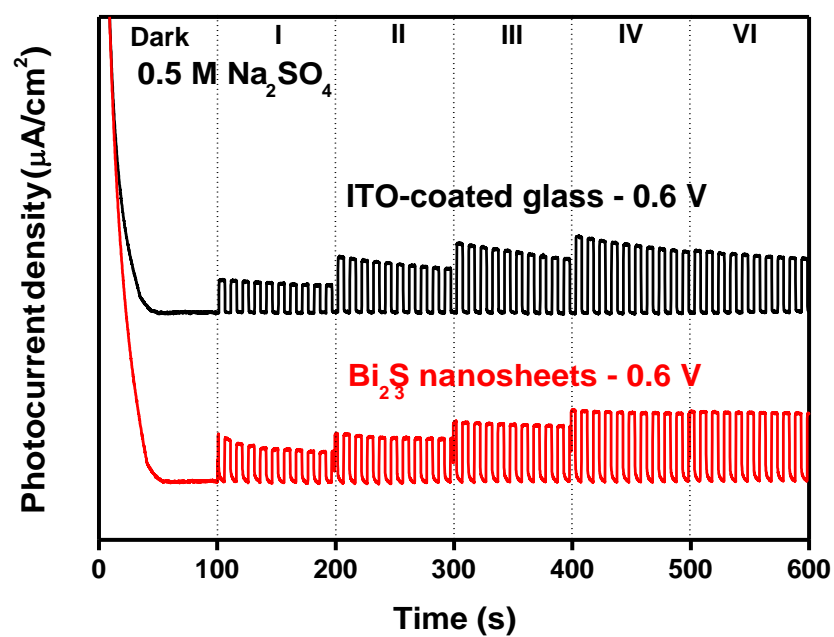

**Fig. S1.** Photoresponse behaviours of the  $\text{Bi}_2\text{S}_3$  nanosheets-based photodetector illuminated by SL in  $0.5 \text{ M Na}_2\text{SO}_4$  at a bias potential of  $0.6 \text{ V}$ . The ON/OFF time interval is  $5 \text{ s}$ .

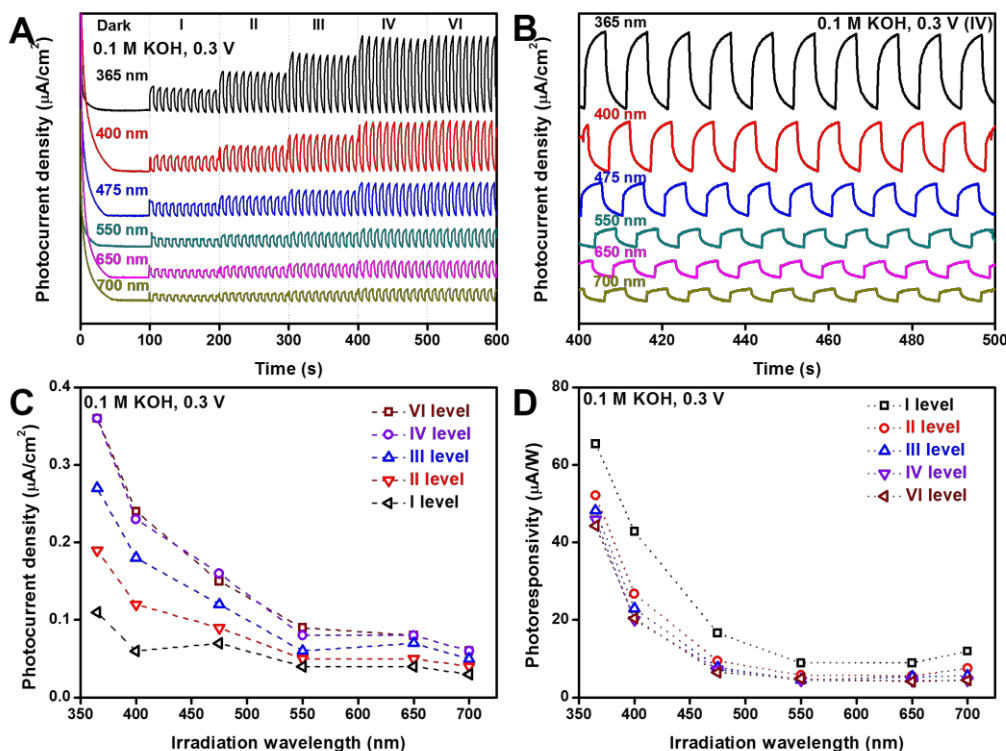

**Fig. S2.** Photoresponse behaviour of the  $\text{Bi}_2\text{S}_3$  nanosheets-based photodetector under the illuminations of light (365, 400, 475, 550, 650, and 700 nm), at an applied bias potential of 0.3 V in 0.1 M KOH, under various light power densities of I, II, III, IV and VI levels. For clarity, a naked ITO-coated glass was added in the profiles. (A) ON/OFF switching behaviours of photocurrent density ( $I_{\text{ph}}$ ) as a function of time, and (B) selected region under light power density at IV level. The ON/OFF time interval is 5s. (C)  $I_{\text{ph}}$  values as a function of irradiation wavelength under various light power densities. (D) Photoresponsivity ( $R_{\text{ph}}$ ) values as a function of irradiation wavelength under various light power densities.

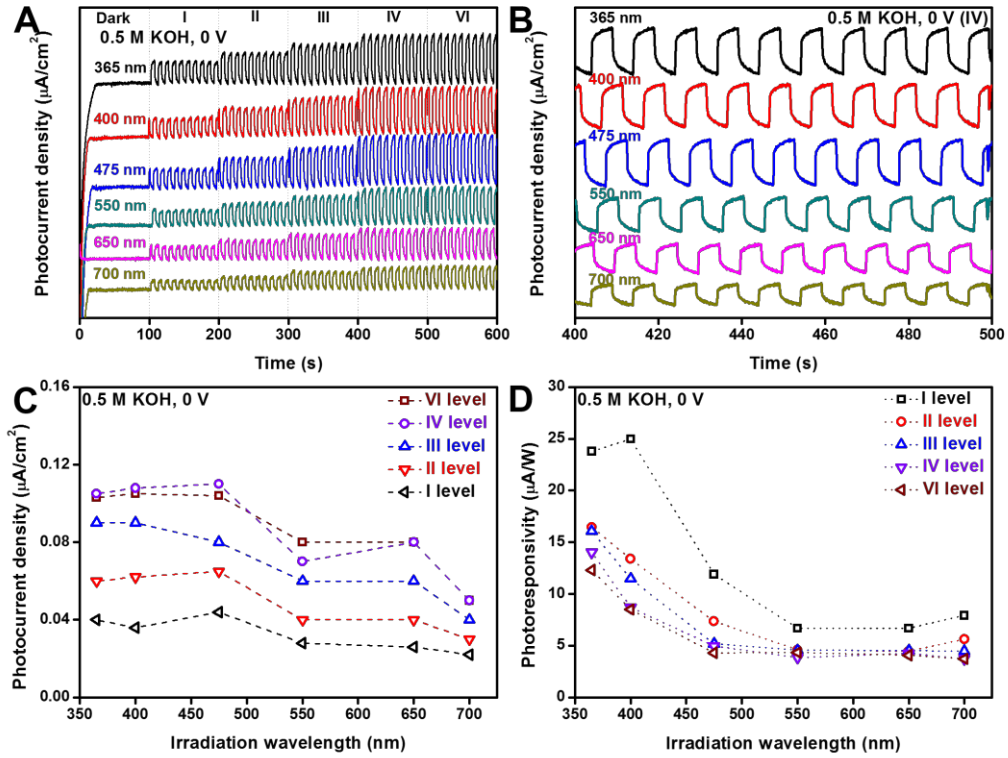

**Fig. S3.** Photoresponse behaviour of the  $\text{Bi}_2\text{S}_3$  nanosheets-based photodetector under the illuminations of light (365, 400, 475, 550, 650, and 700 nm), at an applied bias potential of 0.6 V in 0.5 M KOH, under various light power densities of I, II, III, IV and VI levels. For clarity, a naked ITO-coated glass was added in the profiles. (A) ON/OFF switching behaviours of photocurrent density ( $I_{\text{ph}}$ ) as a function of time, and (B) selected region under light power density at IV level. The ON/OFF time interval is 5s. (C)  $I_{\text{ph}}$  values as a function of irradiation wavelength under various light power densities. (D) Photoresponsivity ( $R_{\text{ph}}$ ) values as a function of irradiation wavelength under various light power densities.

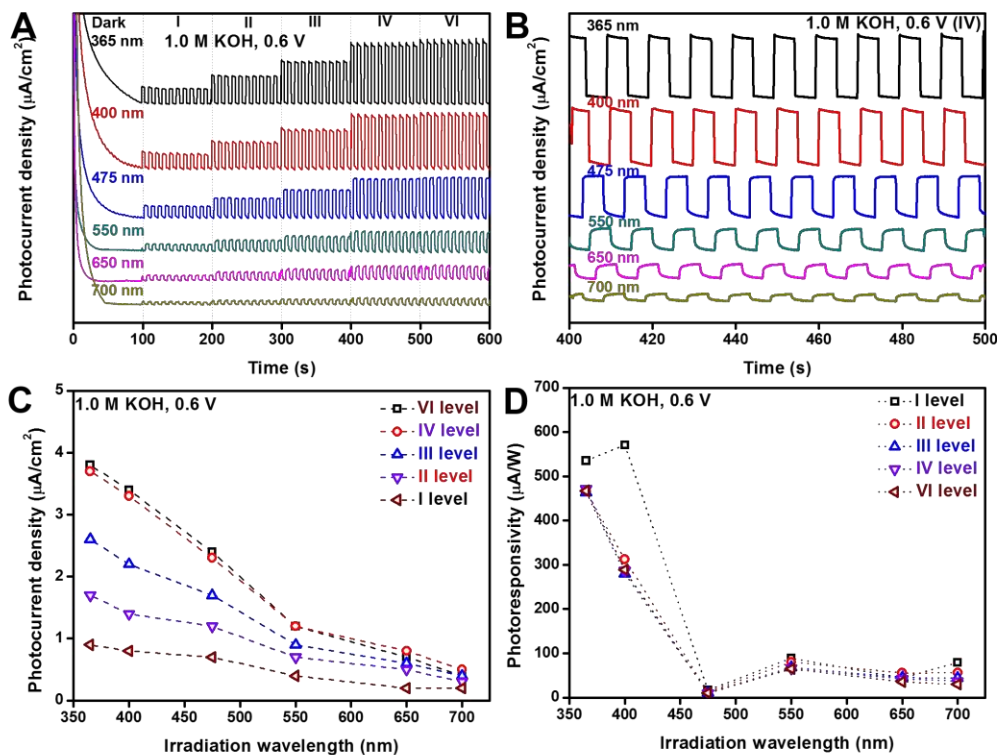

**Fig. S4.** Photoresponse behaviour of the Bi<sub>2</sub>S<sub>3</sub> nanosheets-based photodetector under the illuminations of light (365, 400, 475, 550, 650, and 700 nm), at an applied bias potential of 0.6 V in 1.0 M KOH, under various light power densities of I, II, III, IV and VI levels. For clarity, a naked ITO-coated glass was added in the profiles. (A) ON/OFF switching behaviours of photocurrent density ( $I_{ph}$ ) as a function of time, and (B) selected region under light power density at IV level. The ON/OFF time interval is 5s. (C)  $I_{ph}$  values as a function of irradiation wavelength under various light power densities. (D) Photoresponsivity ( $R_{ph}$ ) values as a function of irradiation wavelength under various light power densities.

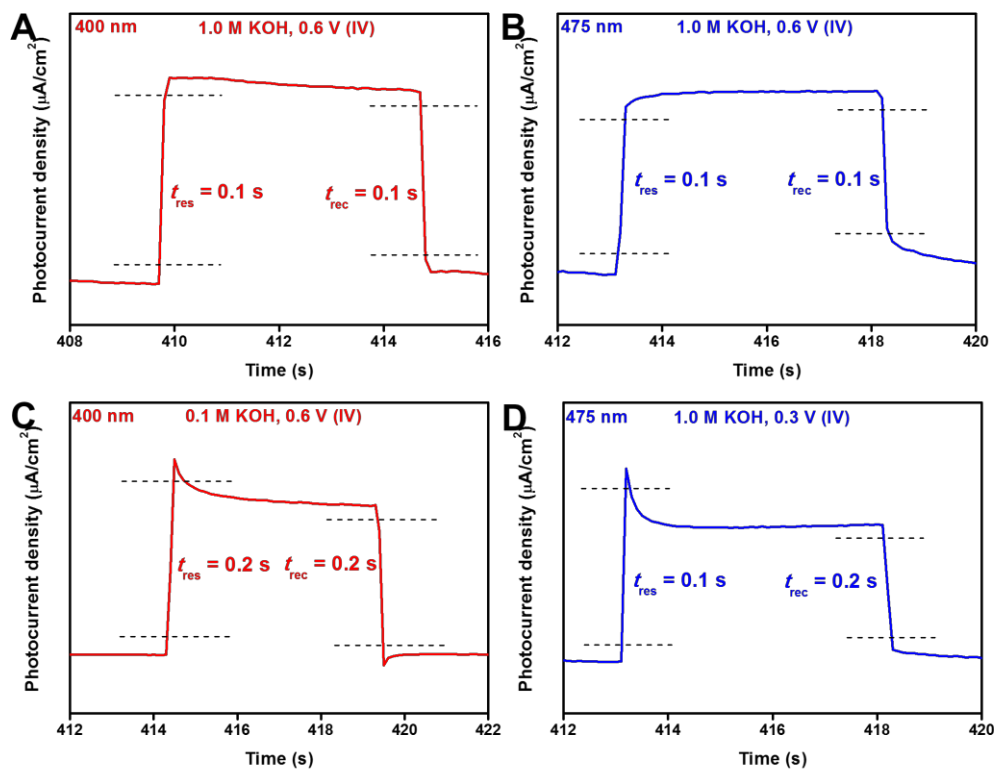

**Fig. S5.** The profiles of response time ( $t_{\text{res}}$ ) and recovery time ( $t_{\text{rec}}$ ) of the  $\text{Bi}_2\text{S}_3$  nanosheets-based photodetector in various KOH concentration and applied bias potentials at 400 nm and 475 nm at the same level IV. (A) 400 nm, 1.0 M KOH, 0.6 V; (B) 475 nm, 1.0 M KOH, 0.6 V; (C) 400 nm, 0.1 M KOH, 0.6 V; (D) 475 nm, 1.0 M KOH, 0.3 V.

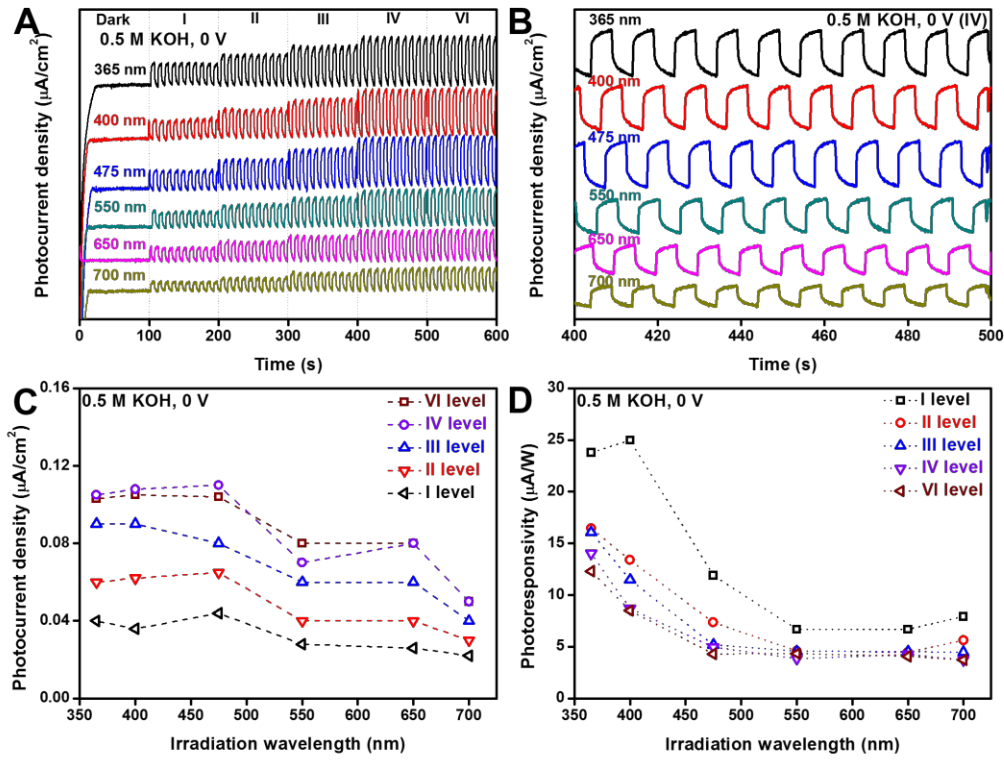

**Fig. S6.** Self-driven photoresponse behaviour of the  $\text{Bi}_2\text{S}_3$  nanosheets-based photodetector under the illuminations of light (365, 400, 475, 550, 650, and 700 nm), without an applied bias potential (0 V) in 0.5 M KOH under various light power densities of I, II, III, IV and VI levels. For clarity, a naked ITO-coated glass was added in the profiles. (A) ON/OFF switching behaviours of photocurrent density ( $I_{\text{ph}}$ ) as a function of time, and (B) selected region under light power density at IV level. The ON/OFF time interval is 5s. (C)  $I_{\text{ph}}$  values as a function of irradiation wavelength under various light power densities. (D) Photoresponsivity ( $R_{\text{ph}}$ ) values as a function of irradiation wavelength under various light power densities.



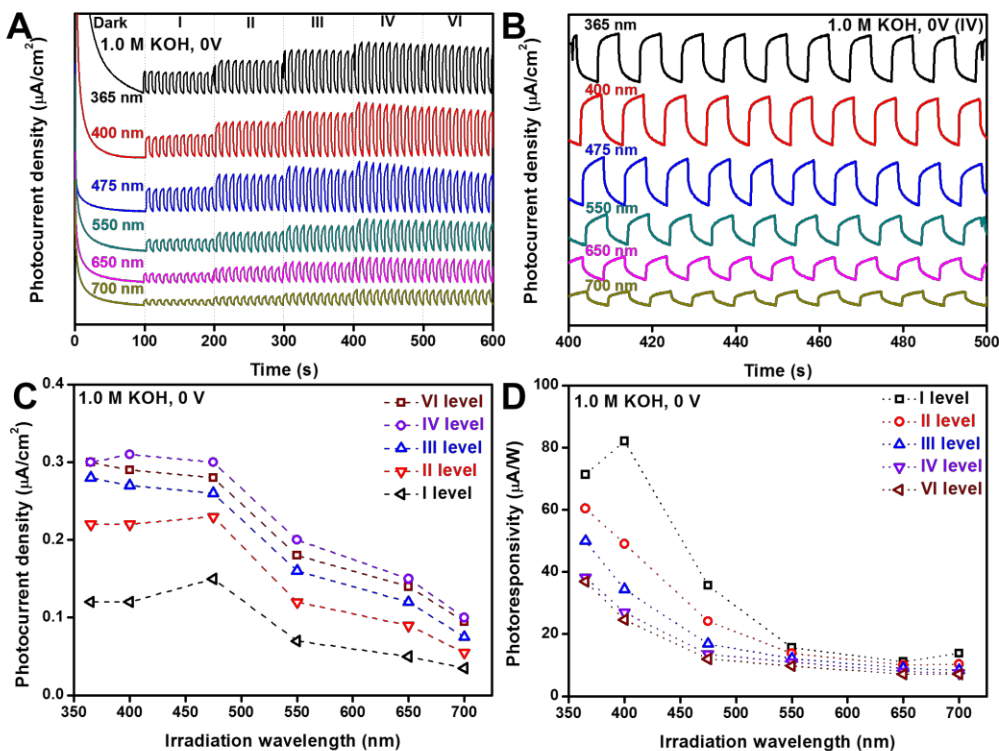

**Fig. S7.** Self-driven photoresponse behaviour of the  $\text{Bi}_2\text{S}_3$  nanosheets-based photodetector under the illuminations of light (365, 400, 475, 550, 650, and 700 nm), without an applied bias potential (0 V) in 1.0 M KOH under various light power densities of I, II, III, IV and VI levels. For clarity, a naked ITO-coated glass was added in the profiles. (A) ON/OFF switching behaviours of photocurrent density ( $I_{\text{ph}}$ ) as a function of time, and (B) selected region under light power density at IV level. The ON/OFF time interval is 5s. (C)  $I_{\text{ph}}$  values as a function of irradiation wavelength under various light power densities. (D) Photoresponsivity ( $R_{\text{ph}}$ ) values as a function of irradiation wavelength under various light power densities.

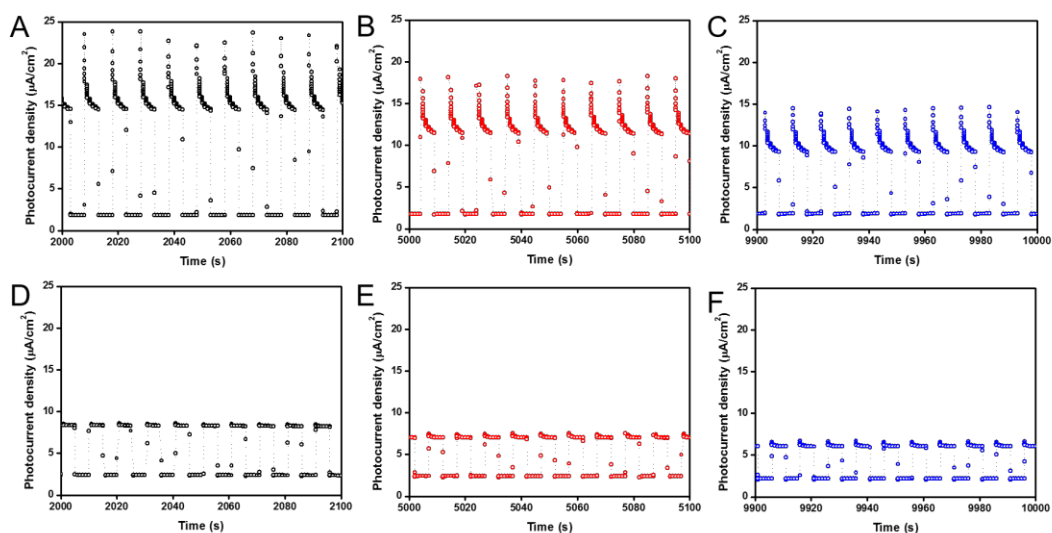

**Fig. S8.** Stability of photoresponse behaviour of the  $\text{Bi}_2\text{S}_3$  nanosheets-based photodetector illuminated by SL in 0.1 M KOH at a bias potential of 0.6 V before (A, B and C) and after (D, E and F) 1 month at IV level. A typical stability measurement lasted 10,000 s and specific moments of 2,000 s to 2,100 s (A and D), 5,000 s to 5,100 s (B and E) and 9,900 s to 10,000 s (C and F) were chosen to evaluate their stability behaviours.
